# Supplementary material for: EPR evidence for α-triphenylstannylvinyl radicals in the O-directed hydrostannation of dialkylacetylenes with Ph3SnH/cat. Et3B/O2
Source: Royal Society of Chemistry journal article supplement (doi:10.1039/d1cc01702k), 2021-01-01
Supplement: d1cc01702k1.pdf [file d1cc01702k1.pdf]

# EPR Evidence for $\alpha$ -Triphenylstannylvinyl Radicals in the O-Directed Hydrostannation of Dialkylacetylenes with $\text{Ph}_3\text{SnH}/\text{cat. Et}_3\text{B}/\text{O}_2$

Hamish A. Watson,<sup>a</sup> Alistair J. Fielding<sup>\*b</sup> and Karl J. Hale<sup>\*a</sup>

*<sup>a</sup>The School of Chemistry & Chemical Engineering,*

*Queen's University Belfast,*

*Stranmillis Road, Belfast BT9 5AG,*

*Northern Ireland, United Kingdom*

*and*

*<sup>b</sup>The School of Pharmacy and Biomolecular Sciences,*

*Liverpool John Moores University,*

*Byrom Street, Liverpool L3 3AF,*

*United Kingdom.*

## Supporting Information

**(3 Pages Inclusive of Cover Pages)**

### Index

**Pages 2-3**

Experimental Procedures For Generating the  $\alpha$ -Stannylvinyl Radicals (**Z**)-2  
and (**Z**)-9

## General Information

Unless stated otherwise, all reactions were run in dry solvents under an Ar atmosphere. Dry THF was distilled from CaH<sub>2</sub> under a N<sub>2</sub> atmosphere and dry PhMe was used as supplied by Sigma-Aldrich. Both dry solvents were taken out by dry syringe under an Ar atmosphere. Ph<sub>3</sub>SnH was purchased from Sigma-Aldrich and used as supplied because of its high quality; it was always handled inside a glove-bag under Ar. EPR experiments were carried out using a Bruker MicroEMX spectrometer with a super high Q cavity at 9.4 GHz, microwave power of 2-20 mW, field modulation of 100 kHz and modulation amplitude of 2-4 G. Field calibration was carried out using 2,2-diphenyl-1-picrylhydrazyl (DPPH). All samples were analyzed in either quartz capillary or 4 mm quartz EPR tubes.

## Experimental Procedures For Generating the $\alpha$ -Stannylvinyl Radicals (**Z**-2 and (**Z**-9

### Optimized Experimental Procedure For Generating the $\alpha$ -Stannylvinyl Radical (**Z**-2 in THF

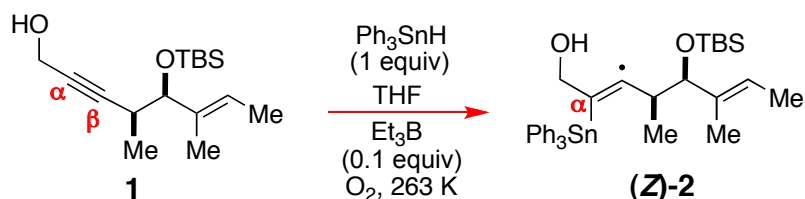

A solution of **1** (1M in THF) was prepared by dissolving **1** (0.2847 g, 1.0 mmol) in dry THF (1 mL) under Ar. A separate solution of Ph<sub>3</sub>SnH (1M in THF) was prepared by weighing out Ph<sub>3</sub>SnH (0.8134 g, 2.32 mmol) inside an argon-filled glove bag and then dissolving in dry THF (2.32 mL) under Ar. To a round-bottom flask containing a solution of alkyne **1** (0.1 mL, 1 M in THF, 0.1 mmol) under Ar was added a solution of Ph<sub>3</sub>SnH (0.1 mL, 1 M in THF, 0.1 mmol) by syringe under Ar. To this resulting stirred mixture was then added Et<sub>3</sub>B (0.01 mL, 1 M in Hex, 0.01 mmol) by syringe under Ar. Air (5 mL) was then bubbled through the solution via syringe before the solution was transferred via glass pipette to a quartz EPR tube, which was then introduced into the EPR spectrometer resonator, which had been precooled to -10 °C. The EPR spectra of (**Z**-2 were then recorded at -10 °C (263 K).

### Optimized Experimental Procedure For Generating the $\alpha$ -Stannylvinyl Radical (**Z**)-2 in PhMe

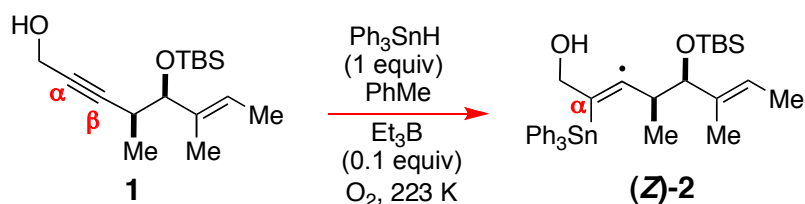

A solution of **1** (1M in PhMe) was prepared by dissolving **1** (0.2777 g, 0.983 mmol) in dry PhMe (1 mL) under Ar. A separate solution of  $\text{Ph}_3\text{SnH}$  (1 M in PhMe) was prepared by weighing out  $\text{Ph}_3\text{SnH}$  (0.5450 g, 1.55 mmol) inside an argon-filled glove bag and then dissolving in dry PhMe (1.6 mL) under Ar. To a round-bottom flask containing a solution of alkyne **1** (0.5 mL, 1M in PhMe, 0.5 mmol) under Ar was added a solution of  $\text{Ph}_3\text{SnH}$  (0.5 mL, 1 M in PhMe, 0.5 mmol) by syringe under Ar. To this resulting stirred mixture was then added  $\text{Et}_3\text{B}$  (0.05 mL, 1 M in Hex, 0.05 mmol) by syringe under Ar, air (5mL) was then bubbled through the solution via syringe before the solution was transferred via glass pipette to a quartz EPR tube, which was then introduced into the EPR spectrometer resonator which had been precooled to  $-50^\circ\text{C}$ . The EPR spectra of (**Z**)-2 were then recorded at  $-50^\circ\text{C}$  (223 K).

### Optimized Experimental Procedure For Generating the $\alpha$ -Stannylvinyl Radical (**Z**)-9 in PhMe

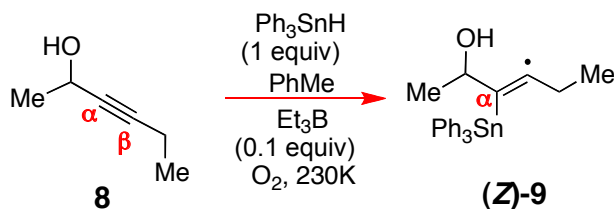

A solution of 3-hexyn-2-ol **8** (1 M in PhMe) was prepared by dissolving 3-hexyn-2-ol **8** (0.098 g, 1.00 mmol) in dry PhMe (1 mL) under Ar. A separate solution of  $\text{Ph}_3\text{SnH}$  (1 M in PhMe) was prepared by weighing out  $\text{Ph}_3\text{SnH}$  (0.4353 g, 1.24 mmol) inside an argon filled glove bag and then dissolving in dry PhMe (1.24 mL) under Ar. To a round-bottom flask containing a solution of 3-hexyn-2-ol **8** (0.25 mL, 1 M in PhMe, 0.25 mmol) under Ar was added a solution of  $\text{Ph}_3\text{SnH}$  (0.25 mL, 1 M in PhMe, 0.25 mmol) by syringe under Ar. To this resulting stirred mixture was then added  $\text{Et}_3\text{B}$  (0.025 mL, 1 M in Hex, 0.025 mmol) by syringe under Ar. Air (5 mL) was then bubbled through the solution via syringe before the solution was transferred via glass pipette to a quartz EPR tube which was then placed inside the EPR resonator which had been precooled to  $-43^\circ\text{C}$  (230 K). The EPR spectra of (**Z**)-9 were then recorded at  $-43^\circ\text{C}$  (230 K).
